# Supplementary material for: Association of Polyphenols Consumption with Risk for Gestational Diabetes Mellitus and Preeclampsia: A Systematic Review and Meta-Analysis
Source: MDPI journal article supplement (doi:10.3390/antiox11112294), 2022-11-19
Supplement: s1 [file s1]

**Supplementary Table S1. PRISMA checklist.**

| Section/topic                      | #     | Checklist item                                                                                                                                                                                                                                                                                              | Reported on page #                                                  |
|------------------------------------|-------|-------------------------------------------------------------------------------------------------------------------------------------------------------------------------------------------------------------------------------------------------------------------------------------------------------------|---------------------------------------------------------------------|
| <b>TITLE</b>                       |       |                                                                                                                                                                                                                                                                                                             |                                                                     |
| Title                              | 1     | Identify the report as a systematic review, meta-analysis, or both.                                                                                                                                                                                                                                         | 1                                                                   |
| <b>ABSTRACT</b>                    |       |                                                                                                                                                                                                                                                                                                             |                                                                     |
| Structured summary                 | 2     | Provide a structured summary including, as applicable: background; objectives; data sources; study eligibility criteria, participants, and interventions; study appraisal and synthesis methods; results; limitations; conclusions and implications of key findings; systematic review registration number. | 2                                                                   |
| <b>INTRODUCTION</b>                |       |                                                                                                                                                                                                                                                                                                             |                                                                     |
| Rationale                          | 3     | Describe the rationale for the review in the context of what is already known.                                                                                                                                                                                                                              | 3                                                                   |
| Objectives                         | 4     | Provide an explicit statement of questions being addressed with reference to participants, interventions, comparisons, outcomes, and study design (PICOS).                                                                                                                                                  | 4                                                                   |
| <b>METHODS</b>                     |       |                                                                                                                                                                                                                                                                                                             |                                                                     |
| Protocol and registration          | 4-7   | Indicate if a review protocol exists, if and where it can be accessed (e.g., Web address), and, if available, provide registration information including registration number.                                                                                                                               | Protocol detailed in the Methods section page 4-7<br>Not registered |
| Eligibility criteria               | 5     | Specify study characteristics (e.g., PICOS, length of follow-up) and report characteristics (e.g., years considered, language, publication status) used as criteria for eligibility, giving rationale.                                                                                                      | 5                                                                   |
| Information sources                | 4     | Describe all information sources (e.g., databases with dates of coverage, contact with study authors to identify additional studies) in the search and date last searched.                                                                                                                                  | 4                                                                   |
| Search                             |       | Present full electronic search strategy for at least one database, including any limits used, such that it could be repeated.                                                                                                                                                                               | Suppl Table 3                                                       |
| Study selection                    | 5     | State the process for selecting studies (i.e., screening, eligibility, included in systematic review, and, if applicable, included in the meta-analysis).                                                                                                                                                   | 5                                                                   |
| Data collection process            | 6     | Describe method of data extraction from reports (e.g., piloted forms, independently, in duplicate) and any processes for obtaining and confirming data from investigators.                                                                                                                                  | 6                                                                   |
| Data items                         | 7-11  | List and define all variables for which data were sought (e.g., PICOS, funding sources) and any assumptions and simplifications made.                                                                                                                                                                       | 7-10                                                                |
| Risk of bias in individual studies | 7-11  | Describe methods used for assessing risk of bias of individual studies (including specification of whether this was done at the study or outcome level), and how this information is to be used in any data synthesis.                                                                                      | 7-10                                                                |
| Summary measures                   | 10-11 | State the principal summary measures (e.g., risk ratio, difference in means).                                                                                                                                                                                                                               | 10-11                                                               |
| Synthesis of results               | 14    | Describe the methods of handling data and combining results of studies, if done, including measures of consistency (e.g., $I^2$ ) for each meta-analysis.                                                                                                                                                   | 10-11                                                               |

From: Moher D, Liberati A, Tetzlaff J, Altman DG, The PRISMA Group (2009). Preferred Reporting Items for Systematic Reviews and Meta-Analyses: The PRISMA Statement. PLoS Med 6(7): e1000097. doi:10.1371/journal.pmed1000097

**Supplementary Table S2. The electronic search string in different databases.**

| Database       | Search string |                                                                                                                                                                                                                                                                                                                                                                                                                                                                                                                                                                                                                                          |        | Field labels                                                                                                                                                                                                                                                                        | Start date | Last date of search | Number of hits                                                                          |
|----------------|---------------|------------------------------------------------------------------------------------------------------------------------------------------------------------------------------------------------------------------------------------------------------------------------------------------------------------------------------------------------------------------------------------------------------------------------------------------------------------------------------------------------------------------------------------------------------------------------------------------------------------------------------------------|--------|-------------------------------------------------------------------------------------------------------------------------------------------------------------------------------------------------------------------------------------------------------------------------------------|------------|---------------------|-----------------------------------------------------------------------------------------|
| PubMed Medline | 1             | Curcumin/                                                                                                                                                                                                                                                                                                                                                                                                                                                                                                                                                                                                                                | 11750  | <ul style="list-style-type: none"> <li>exp/ = exploded MeSH term</li> <li>/ = non exploded MeSH term</li> <li>.ti,ab,kf. = title, abstract and author keywords</li> <li>adjx = within x words, regardless of order</li> <li>* = truncation of word for alternate endings</li> </ul> | unbound    | May 2022            | Polyphenols<br>Pregnancy complications: 3,085<br>Diet<br>Pregnancy complications: 7,627 |
|                | 2             | Coumaric Acids/                                                                                                                                                                                                                                                                                                                                                                                                                                                                                                                                                                                                                          | 4844   |                                                                                                                                                                                                                                                                                     |            |                     |                                                                                         |
|                | 3             | exp Flavonoids/                                                                                                                                                                                                                                                                                                                                                                                                                                                                                                                                                                                                                          | 114145 |                                                                                                                                                                                                                                                                                     |            |                     |                                                                                         |
|                | 4             | Phenols/                                                                                                                                                                                                                                                                                                                                                                                                                                                                                                                                                                                                                                 | 52178  |                                                                                                                                                                                                                                                                                     |            |                     |                                                                                         |
|                | 5             | exp Polyphenols/                                                                                                                                                                                                                                                                                                                                                                                                                                                                                                                                                                                                                         | 21677  |                                                                                                                                                                                                                                                                                     |            |                     |                                                                                         |
|                | 6             | exp Tannins/                                                                                                                                                                                                                                                                                                                                                                                                                                                                                                                                                                                                                             | 10788  |                                                                                                                                                                                                                                                                                     |            |                     |                                                                                         |
|                | 7             | (anthocyani* or benzoflavone? or biflavonoid* or bioflavonoid* or catechin* or catechuic acid* or catergen* or chalcon* or cianidanol* or coumarate or coumaric acid* or curcumin or cyanidanol* or diferuloylmethane or dikvertin* or epicatechin* or flavanone? or flavonoid* or flavone? or flavonol* or homoisoflavon* or hydroxycinnamic acid* or isoflavone? or leucoanthocyanidin* or phenolic acid* or phenol? or phlobatannin* or polyphenol* or proanthocyanidin* or quercetin* or resveratrol* or SRT 501 or SRT501 or stilbenetriol or tannin or tannins or tannic acid* or trihydroxystilbene or turmeric yellow).ti,ab,kf. | 201007 |                                                                                                                                                                                                                                                                                     |            |                     |                                                                                         |
|                | 8             | or/1-7                                                                                                                                                                                                                                                                                                                                                                                                                                                                                                                                                                                                                                   | 275996 |                                                                                                                                                                                                                                                                                     |            |                     |                                                                                         |
|                | 9             | Chocolate/ or Cacao/ or Coffee/                                                                                                                                                                                                                                                                                                                                                                                                                                                                                                                                                                                                          | 10847  |                                                                                                                                                                                                                                                                                     |            |                     |                                                                                         |
|                | 10            | Tea/                                                                                                                                                                                                                                                                                                                                                                                                                                                                                                                                                                                                                                     | 10837  |                                                                                                                                                                                                                                                                                     |            |                     |                                                                                         |
|                | 11            | Fruit/                                                                                                                                                                                                                                                                                                                                                                                                                                                                                                                                                                                                                                   | 46872  |                                                                                                                                                                                                                                                                                     |            |                     |                                                                                         |
|                | 12            | exp Vegetables/                                                                                                                                                                                                                                                                                                                                                                                                                                                                                                                                                                                                                          | 32654  |                                                                                                                                                                                                                                                                                     |            |                     |                                                                                         |

|    |                                                                                                                                                                                                                                                                                                                                                                   |        |  |  |  |  |
|----|-------------------------------------------------------------------------------------------------------------------------------------------------------------------------------------------------------------------------------------------------------------------------------------------------------------------------------------------------------------------|--------|--|--|--|--|
| 13 | (almond? or apple? or artichoke* or bean or beans or berries or berry or blackberr* or black currant? or blueberr* or chicory or chocolate or coffee or cocoa powder or fruit* or grapes or hazelnut? or mulberr* or nut? or pecan? or plum? or red onion* or spinach or soy or soybean? or strawberr* or sweet cherr* or tea or vegetable* or walnut?).ti,ab,kf. | 324387 |  |  |  |  |
| 14 | or/9-13                                                                                                                                                                                                                                                                                                                                                           | 342546 |  |  |  |  |
| 15 | 8 or 14                                                                                                                                                                                                                                                                                                                                                           | 574447 |  |  |  |  |
| 16 | exp Pregnancy Complications/                                                                                                                                                                                                                                                                                                                                      | 441441 |  |  |  |  |
| 17 | ((diabet* or glucose*) adj5 (gravidarum or gestational or maternal or                                                                                                                                                                                                                                                                                             | 29964  |  |  |  |  |
| 18 | ((arterial pressure or hypertens*) adj2 (maternal or pregnan* or gestetional)).ti,ab,kf.                                                                                                                                                                                                                                                                          | 10496  |  |  |  |  |
| 19 | (EPH or edema-proteinuria-hypertension gestosis or hypertension-edema-proteinuria gestosis or preeclampsia or pre-eclampsia or pregnancy complication* or (pregnan* adj2 toxemia*) or proteinuria-edema-hypertension gestosis).ti,ab,kf.                                                                                                                          | 57495  |  |  |  |  |
| 20 | Fetal Growth Retardation/                                                                                                                                                                                                                                                                                                                                         | 16910  |  |  |  |  |
| 21 | Infant, Small for Gestational Age/                                                                                                                                                                                                                                                                                                                                | 7803   |  |  |  |  |
| 22 | ((f?etal or fetus or in utero or intrauterine or prenatal) adj3 growth).ti,ab,kf.                                                                                                                                                                                                                                                                                 | 33386  |  |  |  |  |
| 23 | ((small or large) adj3 (date or gestational age)).ti,ab,kf.                                                                                                                                                                                                                                                                                                       | 15033  |  |  |  |  |
| 24 | or/16-23                                                                                                                                                                                                                                                                                                                                                          | 482952 |  |  |  |  |
| 25 | 15 and 24                                                                                                                                                                                                                                                                                                                                                         | 3058   |  |  |  |  |
| 26 | Diet/                                                                                                                                                                                                                                                                                                                                                             | 168111 |  |  |  |  |

|        |    |                                                                                                                                                                                                                                                                                                                                                                                                                                                                                                                                                                                                                                                                                                                                                                                                                                                                                                                                                                                                                                   |         |                                                                                                                                                                                                                                                                                                                           |         |          |                                                                                         |
|--------|----|-----------------------------------------------------------------------------------------------------------------------------------------------------------------------------------------------------------------------------------------------------------------------------------------------------------------------------------------------------------------------------------------------------------------------------------------------------------------------------------------------------------------------------------------------------------------------------------------------------------------------------------------------------------------------------------------------------------------------------------------------------------------------------------------------------------------------------------------------------------------------------------------------------------------------------------------------------------------------------------------------------------------------------------|---------|---------------------------------------------------------------------------------------------------------------------------------------------------------------------------------------------------------------------------------------------------------------------------------------------------------------------------|---------|----------|-----------------------------------------------------------------------------------------|
|        | 27 | Diet, Mediterranean/                                                                                                                                                                                                                                                                                                                                                                                                                                                                                                                                                                                                                                                                                                                                                                                                                                                                                                                                                                                                              | 3972    |                                                                                                                                                                                                                                                                                                                           |         |          |                                                                                         |
|        | 28 | ((intake or consum*) adj3 (diet* or food or nutrition*)).ti,ab,kf.                                                                                                                                                                                                                                                                                                                                                                                                                                                                                                                                                                                                                                                                                                                                                                                                                                                                                                                                                                | 134967  |                                                                                                                                                                                                                                                                                                                           |         |          |                                                                                         |
|        | 29 | (eat or eating or ingest*).ti.ab.kf.                                                                                                                                                                                                                                                                                                                                                                                                                                                                                                                                                                                                                                                                                                                                                                                                                                                                                                                                                                                              | 200843  |                                                                                                                                                                                                                                                                                                                           |         |          |                                                                                         |
|        | 30 | mediterranean diet*.ti,ab,kf.                                                                                                                                                                                                                                                                                                                                                                                                                                                                                                                                                                                                                                                                                                                                                                                                                                                                                                                                                                                                     | 5877    |                                                                                                                                                                                                                                                                                                                           |         |          |                                                                                         |
|        | 31 | or/26-30                                                                                                                                                                                                                                                                                                                                                                                                                                                                                                                                                                                                                                                                                                                                                                                                                                                                                                                                                                                                                          | 449882  |                                                                                                                                                                                                                                                                                                                           |         |          |                                                                                         |
|        | 32 | 24 and 31                                                                                                                                                                                                                                                                                                                                                                                                                                                                                                                                                                                                                                                                                                                                                                                                                                                                                                                                                                                                                         | 7627    |                                                                                                                                                                                                                                                                                                                           |         |          |                                                                                         |
| Embase | #1 | 'curcumin'/exp                                                                                                                                                                                                                                                                                                                                                                                                                                                                                                                                                                                                                                                                                                                                                                                                                                                                                                                                                                                                                    | 27,948  | <ul style="list-style-type: none"><li>• /exp = exploded Emtree term</li><li>• /de = non exploded Emtree term</li><li>• /mj = major focus</li><li>• ti,ab,kw = title, abstract and author keywords</li><li>• NEAR/x = within x words, regardless of order</li><li>• * = truncation of word for alternate endings</li></ul> | unbound | May 2022 | Polyphenols<br>Pregnancy complications: 2,082<br>Diet<br>Pregnancy complications: 4,134 |
|        | #2 | 'coumaric acid'/de                                                                                                                                                                                                                                                                                                                                                                                                                                                                                                                                                                                                                                                                                                                                                                                                                                                                                                                                                                                                                | 5,197   |                                                                                                                                                                                                                                                                                                                           |         |          |                                                                                         |
|        | #3 | 'flavonoid'/exp                                                                                                                                                                                                                                                                                                                                                                                                                                                                                                                                                                                                                                                                                                                                                                                                                                                                                                                                                                                                                   | 166,187 |                                                                                                                                                                                                                                                                                                                           |         |          |                                                                                         |
|        | #4 | 'phenol derivative'/de                                                                                                                                                                                                                                                                                                                                                                                                                                                                                                                                                                                                                                                                                                                                                                                                                                                                                                                                                                                                            | 60,603  |                                                                                                                                                                                                                                                                                                                           |         |          |                                                                                         |
|        | #5 | polyphenol'/de                                                                                                                                                                                                                                                                                                                                                                                                                                                                                                                                                                                                                                                                                                                                                                                                                                                                                                                                                                                                                    | 22,611  |                                                                                                                                                                                                                                                                                                                           |         |          |                                                                                         |
|        | #6 | 'tannin derivative'/exp                                                                                                                                                                                                                                                                                                                                                                                                                                                                                                                                                                                                                                                                                                                                                                                                                                                                                                                                                                                                           | 24,460  |                                                                                                                                                                                                                                                                                                                           |         |          |                                                                                         |
|        | #7 | anthocyani*:ti,ab,kw OR<br>benzoflavone\$:ti,ab,kw OR<br>biflavonoid*:ti,ab,kw OR<br>bioflavonoid*:ti,ab,kw OR<br>catechin*:ti,ab,kw OR<br>'catechuic acid*:ti,ab,kw OR<br>catergen*:ti,ab,kw OR<br>chalcon*:ti,ab,kw OR<br>cianidanol*:ti,ab,kw OR<br>'coumaric acid*:ti,ab,kw OR<br>curcumin\$:ti,ab,kw OR<br>cyanidanol*:ti,ab,kw OR<br>diferuloylmethane:ti,ab,kw OR<br>dikvertin*:ti,ab,kw OR<br>epicatechin*:ti,ab,kw OR<br>flavanone\$:ti,ab,kw OR<br>flavonoid*:ti,ab,kw OR<br>flavone\$:ti,ab,kw OR<br>flavonol*:ti,ab,kw OR<br>homoisoflavon*:ti,ab,kw OR<br>'hydroxycinnamic acid*:ti,ab,kw OR<br>isoflavone\$:ti,ab,kw OR<br>leucoanthocyanidin*:ti,ab,kw OR<br>OR 'phenolic acid*:ti,ab,kw OR<br>phenol\$:ti,ab,kw OR<br>phlobatannin*:ti,ab,kw OR<br>polyphenol*:ti,ab,kw OR<br>proanthocyanidin*:ti,ab,kw OR<br>quercetin*:ti,ab,kw OR<br>resveratrol*:ti,ab,kw OR 'srt 501':ti,ab,kw OR<br>srt501:ti,ab,kw OR<br>stilbenetriol:ti,ab,kw OR<br>tannin:ti,ab,kw OR<br>tannins:ti,ab,kw OR 'tannic acid*:ti.ab.kw OR | 259,024 |                                                                                                                                                                                                                                                                                                                           |         |          |                                                                                         |

|     |  |                                                                                                                                                                                                                                                                                                                                                                                                                                                                                                                                                                                                                                                                                                                                          |         |  |  |  |  |
|-----|--|------------------------------------------------------------------------------------------------------------------------------------------------------------------------------------------------------------------------------------------------------------------------------------------------------------------------------------------------------------------------------------------------------------------------------------------------------------------------------------------------------------------------------------------------------------------------------------------------------------------------------------------------------------------------------------------------------------------------------------------|---------|--|--|--|--|
|     |  | trihydroxystilbene:ti,ab,kw<br>OR 'turmeric yellow':ti,ab,kw                                                                                                                                                                                                                                                                                                                                                                                                                                                                                                                                                                                                                                                                             |         |  |  |  |  |
| #8  |  | #1 OR #2 OR #3 OR #4 OR<br>#5 OR #6 OR #7                                                                                                                                                                                                                                                                                                                                                                                                                                                                                                                                                                                                                                                                                                | 358,077 |  |  |  |  |
| #9  |  | 'chocolate'/de                                                                                                                                                                                                                                                                                                                                                                                                                                                                                                                                                                                                                                                                                                                           | 1,769   |  |  |  |  |
| #10 |  | coffee'/exp                                                                                                                                                                                                                                                                                                                                                                                                                                                                                                                                                                                                                                                                                                                              | 16,077  |  |  |  |  |
| #11 |  | 'fruit'/exp                                                                                                                                                                                                                                                                                                                                                                                                                                                                                                                                                                                                                                                                                                                              | 150,974 |  |  |  |  |
| #12 |  | 'tea'/de                                                                                                                                                                                                                                                                                                                                                                                                                                                                                                                                                                                                                                                                                                                                 | 20,917  |  |  |  |  |
| #13 |  | 'vegetable'/exp                                                                                                                                                                                                                                                                                                                                                                                                                                                                                                                                                                                                                                                                                                                          | 220,123 |  |  |  |  |
| #14 |  | almond\$:ti,ab,kw OR<br>apple\$:ti,ab,kw OR<br>artichoke*:ti,ab,kw OR<br>bean:ti,ab,kw OR<br>beans:ti,ab,kw OR<br>berries:ti,ab,kw OR<br>berry:ti,ab,kw OR<br>blackberr*:ti,ab,kw OR 'black<br>currant\$:ti,ab,kw OR<br>blueberr*:ti,ab,kw OR<br>chicory:ti,ab,kw OR<br>chocolate:ti,ab,kw OR<br>coffee:ti,ab,kw OR 'cocoa<br>powder':ti,ab,kw OR<br>fruit*:ti,ab,kw OR<br>grapes:ti,ab,kw OR<br>hazelnut\$:ti,ab,kw OR<br>mulberr*:ti,ab,kw OR<br>nut\$:ti,ab,kw OR<br>pecan\$:ti,ab,kw OR<br>plum\$:ti,ab,kw OR 'red<br>onion*:ti,ab,kw OR<br>spinach:ti,ab,kw OR<br>soy:ti,ab,kw OR<br>soybean\$:ti,ab,kw OR<br>strawberr*:ti,ab,kw OR<br>'sweet cherr*:ti,ab,kw OR<br>tea:ti,ab,kw OR<br>vegetable*:ti,ab,kw OR<br>walnut\$:ti,ab,kw | 379,983 |  |  |  |  |
| #15 |  | #9 OR #10 OR #11 OR #12<br>OR #13 OR #14                                                                                                                                                                                                                                                                                                                                                                                                                                                                                                                                                                                                                                                                                                 | 547,989 |  |  |  |  |
| #16 |  | #8 OR #15                                                                                                                                                                                                                                                                                                                                                                                                                                                                                                                                                                                                                                                                                                                                | 833,708 |  |  |  |  |
| #17 |  | 'pregnancy<br>complication'/exp                                                                                                                                                                                                                                                                                                                                                                                                                                                                                                                                                                                                                                                                                                          | 158,645 |  |  |  |  |
| #18 |  | ((diabet* OR glucose*)<br>NEAR/3 (gravidarum OR<br>gestational OR maternal OR<br>pregnan*)):ti,ab,kw                                                                                                                                                                                                                                                                                                                                                                                                                                                                                                                                                                                                                                     | 40,990  |  |  |  |  |
| #19 |  | ((('arterial pressure' OR<br>hypertens*) NEAR/2<br>(matern* OR pregnan* OR<br>gestetional)):ti,ab,kw                                                                                                                                                                                                                                                                                                                                                                                                                                                                                                                                                                                                                                     | 15,360  |  |  |  |  |
| #20 |  | eph:ti,ab,kw OR 'edema-<br>proteinuria-hypertension<br>gestosis':ti,ab,kw OR                                                                                                                                                                                                                                                                                                                                                                                                                                                                                                                                                                                                                                                             | 61,154  |  |  |  |  |

|                           |     |                                                                                                                                                                                                                                                                                                                                                                                                                                  |         |                                                                                                                                                                                                                 |         |          |                                                                                                       |
|---------------------------|-----|----------------------------------------------------------------------------------------------------------------------------------------------------------------------------------------------------------------------------------------------------------------------------------------------------------------------------------------------------------------------------------------------------------------------------------|---------|-----------------------------------------------------------------------------------------------------------------------------------------------------------------------------------------------------------------|---------|----------|-------------------------------------------------------------------------------------------------------|
|                           |     | 'hypertension-edema-proteinuria gestosis':ti,ab,kw<br>OR preeclamp*:ti,ab,kw OR<br>'pre-eclamp*':ti,ab,kw OR<br>'pregnancy<br>complication':ti,ab,kw OR<br>((pregnan* NEAR/2<br>toxemia*):ti,ab,kw) OR<br>'proteinuria-edema-<br>hypertension<br>gestosis':ti,ab,kw                                                                                                                                                              |         |                                                                                                                                                                                                                 |         |          |                                                                                                       |
|                           | #21 | 'intrauterine growth<br>retardation'/de                                                                                                                                                                                                                                                                                                                                                                                          | 30,572  |                                                                                                                                                                                                                 |         |          |                                                                                                       |
|                           | #22 | 'large for gestational age'/de                                                                                                                                                                                                                                                                                                                                                                                                   | 3,645   |                                                                                                                                                                                                                 |         |          |                                                                                                       |
|                           | #23 | 'small for date infant'/de                                                                                                                                                                                                                                                                                                                                                                                                       | 16,830  |                                                                                                                                                                                                                 |         |          |                                                                                                       |
|                           | #24 | ((f\$etal OR fetus OR 'in<br>utero' OR intrauterine OR<br>prenatal) NEAR/3<br>growth):ti,ab,kw                                                                                                                                                                                                                                                                                                                                   | 47,260  |                                                                                                                                                                                                                 |         |          |                                                                                                       |
|                           | #25 | ((small OR large) NEAR/3<br>(date OR 'gestational<br>age')):ti,ab,kw                                                                                                                                                                                                                                                                                                                                                             | 20,880  |                                                                                                                                                                                                                 |         |          |                                                                                                       |
|                           | #26 | #17 OR #18 OR #19 OR #20<br>OR #21 OR #22 OR #23 OR<br>#24 OR #25                                                                                                                                                                                                                                                                                                                                                                | 270,328 |                                                                                                                                                                                                                 |         |          |                                                                                                       |
|                           | #27 | #16 AND #26                                                                                                                                                                                                                                                                                                                                                                                                                      | 2082    |                                                                                                                                                                                                                 |         |          |                                                                                                       |
|                           | #28 | 'diet'/mj                                                                                                                                                                                                                                                                                                                                                                                                                        | 81,698  |                                                                                                                                                                                                                 |         |          |                                                                                                       |
|                           | #29 | 'mediterranean diet'/de                                                                                                                                                                                                                                                                                                                                                                                                          | 9,254   |                                                                                                                                                                                                                 |         |          |                                                                                                       |
|                           | #30 | ((intake OR consum*)<br>NEAR/3 (diet* OR food OR<br>nutrition*)):ti,ab,kw                                                                                                                                                                                                                                                                                                                                                        | 176,220 |                                                                                                                                                                                                                 |         |          |                                                                                                       |
|                           | #31 | eat:ti,ab,kw OR<br>eating:ti,ab,kw OR<br>ingest*:ti,ab,kw                                                                                                                                                                                                                                                                                                                                                                        | 262,758 |                                                                                                                                                                                                                 |         |          |                                                                                                       |
|                           | #32 | mediterranean diet*:ti,ab,kw                                                                                                                                                                                                                                                                                                                                                                                                     | 8,357   |                                                                                                                                                                                                                 |         |          |                                                                                                       |
|                           | #33 | #28 OR #29 OR #30 OR #31<br>OR #32                                                                                                                                                                                                                                                                                                                                                                                               | 484,028 |                                                                                                                                                                                                                 |         |          |                                                                                                       |
|                           | #34 | #26 AND #33                                                                                                                                                                                                                                                                                                                                                                                                                      | 4134    |                                                                                                                                                                                                                 |         |          |                                                                                                       |
| <b>Web of<br/>Science</b> | #1  | TS=(anthocyani* OR<br>benzoflavone? OR<br>biflavonoid* OR<br>bioflavonoid* OR catechin*<br>OR catechuic acid* OR<br>catergen* OR chalcon* OR<br>cianidanol* OR "coumarate"<br>OR "coumaric acid*" OR<br>"curcumin" OR cyanidanol*<br>OR diferuloylmethane OR<br>dikvertin* OR epicatechin*<br>OR flavanone? OR<br>flavonoid* OR flavone? OR<br>flavonol* OR<br>homoisoflavon* OR<br>"hydroxycinnamic acid*" OR<br>isoflavone? OR | 345,089 | <ul style="list-style-type: none"> <li>• TS/Topic = title, abstract, author keywords and Keywords Plus</li> <li>• NEAR/x = within x words, regardless of order</li> <li>• * = truncation of word for</li> </ul> | unbound | May 2022 | Polyphenols<br>Pregnancy<br>complications:<br>996<br><br>Diet<br>Pregnancy<br>complications:<br>1,956 |

|    |                                                                                                                                                                                                                                                                                                                                                                                                                                       |           |                      |  |  |  |
|----|---------------------------------------------------------------------------------------------------------------------------------------------------------------------------------------------------------------------------------------------------------------------------------------------------------------------------------------------------------------------------------------------------------------------------------------|-----------|----------------------|--|--|--|
|    | leucoanthocyanidin* OR<br>"phenolic acid*" OR phenol?<br>OR phlobatannin* OR<br>polyphenol* OR<br>proanthocyanidin* OR<br>quercetin* OR resveratrol*<br>OR "SRT 501" OR<br>"SRT501" OR "stilbenetriol"<br>OR "tannin" OR "tannins"<br>OR "tannic acid*" OR<br>trihydroxystilbene OR<br>"turmeric yellow")                                                                                                                             |           | alternate<br>endings |  |  |  |
| #2 | TS=(almond? OR apple?<br>OR artichoke* OR "bean"<br>OR "beans" OR "berries"<br>OR "berry" OR blackberr*<br>OR "black currant?" OR<br>blueberr* OR "chicory" OR<br>"chocolate" OR "coffee" OR<br>"cocoa powder" OR fruit*<br>OR "grapes" OR hazelnut?<br>OR mulberr* OR nut? OR<br>pecan? OR plum? OR "red<br>onion*" OR "spinach" OR<br>"soy" OR soybean? OR<br>strawberr* OR "sweet<br>cherr*" OR "tea" OR<br>vegetable* OR walnut?) | 763,799   |                      |  |  |  |
| #3 | #2 OR #1                                                                                                                                                                                                                                                                                                                                                                                                                              | 1,027,554 |                      |  |  |  |
| #4 | TS=((diabet* OR glucose*)<br>NEAR/4 ("gravidarum" OR<br>"gestational" OR "maternal"<br>OR pregnan*) )                                                                                                                                                                                                                                                                                                                                 | 32,445    |                      |  |  |  |
| #5 | TS=((("arterial pressure" OR<br>hypertens*) NEAR/1<br>("maternal" OR pregnan*<br>OR "gestetional") )                                                                                                                                                                                                                                                                                                                                  | 10,969    |                      |  |  |  |
| #6 | TS=((EPH OR "edema-<br>proteinuria-hypertension<br>gestosis" OR "hypertension-<br>edema-proteinuria gestosis"<br>OR "preeclampsia" OR<br>"pre-eclampsia" OR<br>"pregnancy complication*" OR<br>(pregnan* NEAR/1<br>toxemia*) OR "proteinuria-<br>edema-hypertension<br>gestosis") )                                                                                                                                                   | 53,486    |                      |  |  |  |
| #7 | TS=((f?etal OR "fetus" OR<br>"in utero" OR "intrauterine"<br>OR "prenatal") NEAR/2<br>"growth")                                                                                                                                                                                                                                                                                                                                       | 22,090    |                      |  |  |  |
| #8 | TS=((("small" OR "large")<br>NEAR/2 ("date" OR<br>"gestational age") )                                                                                                                                                                                                                                                                                                                                                                | 14,912    |                      |  |  |  |

|  |     |                                                                     |         |  |  |  |  |
|--|-----|---------------------------------------------------------------------|---------|--|--|--|--|
|  | #9  | #8 OR #7 OR #6 OR #5 OR #4                                          | 112,832 |  |  |  |  |
|  | #10 | #9 AND #3                                                           | 996     |  |  |  |  |
|  | #11 | TS=((("intake" OR consum*) NEAR/2 (diet* OR "food" OR nutrition*) ) | 176,025 |  |  |  |  |
|  | #12 | TS=("eat" OR "eating" OR ingest*)                                   | 248,083 |  |  |  |  |
|  | #13 | TS="mediterranean diet"                                             | 10,578  |  |  |  |  |
|  | #14 | #13 OR #12 OR #11                                                   | 405,354 |  |  |  |  |
|  | #15 | #14 AND #9                                                          | 1956    |  |  |  |  |

**Supplementary Table S3. The Newcastle-Ottawa Scale (NOS) for assessing the quality of non-randomized studies in meta-analysis.**

| PE Studies     | Year published | Selection | Comparability | Outcome | Score |
|----------------|----------------|-----------|---------------|---------|-------|
| Triche et al,  | 2008           | ****      | **            | ***     | 9     |
| Wei et al,     | 2009           | ***       | *             | ***     | 7     |
| Saftlas et al, | 2010           | ****      | *             | -       | 5     |



|                      |                       |                  |                      |                |              |
|----------------------|-----------------------|------------------|----------------------|----------------|--------------|
| Kanawishi et al,     | 2021                  | ***              | *                    | **             | 6            |
| <b>PE Studies</b>    | <b>Year published</b> | <b>Selection</b> | <b>Comparability</b> | <b>Outcome</b> | <b>Score</b> |
| Adeney et al,        | 2007                  | *****            | *                    | ***            | 9            |
| Hinkle et al,        | 2015                  | ****             | **                   | ***            | 9            |
| Tryggvadottir et al, | 2016                  | ***              | **                   | **             | 7            |
| Huang et al,         | 2017                  | ***              | **                   | **             | 7            |
| Dong et al,          | 2019                  | ****             | **                   | ***            | 9            |
| Dong et al,          | 2021                  | ***              | *                    | **             | 6            |
| Gao et al,           | 2021                  | ****             | *                    | **             | 7            |
| Sun et al,           | 2021                  | ****             | *                    | **             | 7            |

Scale: a maximum of 4 stars can be awarded for selection, 2 for comparability and 3 for outcomes. A score of  $\geq 6$  indicates a high-quality study. \*: each asterisk (\*) represents a point score for the scale.

**Supplementary Table S4. MOOSE checklist**

| Reporting Criteria                    | Reported (Yes/No) | Reported on Page No. |
|---------------------------------------|-------------------|----------------------|
| <b>Reporting of Background</b>        |                   |                      |
| Problem definition                    | Yes               | 4                    |
| Hypothesis statement                  | No                | NA                   |
| Description of Study Outcome(s)       | Yes               | 4                    |
| Type of exposure or intervention used | Yes               | 4                    |

|                                                                                                                                                                                                                                                                                |     |                               |
|--------------------------------------------------------------------------------------------------------------------------------------------------------------------------------------------------------------------------------------------------------------------------------|-----|-------------------------------|
| Type of study design used                                                                                                                                                                                                                                                      | Yes | 4-6                           |
| Study population                                                                                                                                                                                                                                                               | Yes | 4                             |
| <b>Reporting of Search Strategy</b>                                                                                                                                                                                                                                            |     |                               |
| Qualifications of searchers (e.g., librarians and investigators)                                                                                                                                                                                                               | Yes | 5                             |
| Search strategy, including time period included in the synthesis and keywords                                                                                                                                                                                                  | Yes | 5                             |
| Effort to include all available studies, including contact with authors                                                                                                                                                                                                        | No  | NA                            |
| Databases and registries searched                                                                                                                                                                                                                                              | Yes | 5                             |
| Search software used, name and version, including special features used (e.g., explosion)                                                                                                                                                                                      | No  | NA                            |
| Use of hand searching (e.g., reference lists of obtained articles)                                                                                                                                                                                                             | Yes | 5                             |
| List of citations located and those excluded, including justification                                                                                                                                                                                                          | Yes | Table 1, 2 and Suppl. Table 3 |
| Method for addressing articles published in languages other than English                                                                                                                                                                                                       | No  | NA                            |
| Method of handling abstracts and unpublished studies                                                                                                                                                                                                                           | No  | NA                            |
| Description of any contact with authors                                                                                                                                                                                                                                        | No  | NA                            |
| <b>Reporting of Methods</b>                                                                                                                                                                                                                                                    |     |                               |
| Description of relevance or appropriateness of studies assembled for assessing the hypothesis to be tested                                                                                                                                                                     | Yes | 5                             |
| Rationale for the selection and coding of data (e.g., sound clinical principles or convenience)                                                                                                                                                                                | Yes | 5                             |
| Documentation of how data were classified and coded (e.g., multiple raters, blinding, and interrater reliability)                                                                                                                                                              | Yes | 6                             |
| Assessment of confounding (e.g., comparability of cases and controls in studies where appropriate)                                                                                                                                                                             | No  | NA                            |
| Assessment of study quality, including blinding of quality assessors; stratification or regression on possible predictors of study results                                                                                                                                     | Yes | 6                             |
| Assessment of heterogeneity                                                                                                                                                                                                                                                    | Yes | 7                             |
| Description of statistical methods (e.g., complete description of fixed or random effects models, justification of whether the chosen models account for predictors of study results, dose-response models, or cumulative meta-analysis) in sufficient detail to be replicated | Yes | 7                             |
| Provision of appropriate tables and graphics                                                                                                                                                                                                                                   | Yes | Fig. 1                        |
| <b>Reporting of Results</b>                                                                                                                                                                                                                                                    |     |                               |
| Table giving descriptive information for each study included                                                                                                                                                                                                                   | Yes | 18-21 (Table 1)               |
| Results of sensitivity testing (e.g., subgroup analysis)                                                                                                                                                                                                                       | Yes | 11                            |
| Indication of statistical uncertainty of findings                                                                                                                                                                                                                              | Yes | 11                            |
| <b>Reporting of Discussion</b>                                                                                                                                                                                                                                                 |     |                               |
| Quantitative assessment of bias (e.g., publication bias)                                                                                                                                                                                                                       | No  | NA                            |
| Justification for exclusion (e.g., exclusion of non-English-language citations)                                                                                                                                                                                                | Yes | 15, Suppl Table 3             |
| Assessment of quality of included studies                                                                                                                                                                                                                                      | Yes | Suppl Table 2                 |
| <b>Reporting of Conclusions</b>                                                                                                                                                                                                                                                |     |                               |
| Consideration of alternative explanations for observed results                                                                                                                                                                                                                 | No  | NA                            |

|                                                                                                                             |     |       |
|-----------------------------------------------------------------------------------------------------------------------------|-----|-------|
| Generalization of the conclusions (i.e., appropriate for the data presented and within the domain of the literature review) | Yes | 16    |
| Guidelines for future research                                                                                              | Yes | 16-17 |
| Disclosure of funding source                                                                                                | Yes | 17    |

\*Stroup DF, Berlin JA, Morton SC, et al, for the Meta-analysis Of Observational Studies in Epidemiology (MOOSE) Group. Meta-analysis of Observational Studies in Epidemiology. A Proposal for Reporting. JAMA. 2000;283(15):2008-2012. doi: 10.1001/jama.283.15.2008.

**Supplementary Table S5. Excluded, full text assessed studies with a reason for exclusion from the systematic review and meta-analysis.**

| N | Studies                                                                                                                                                                                                     | Reason for exclusion                                  |
|---|-------------------------------------------------------------------------------------------------------------------------------------------------------------------------------------------------------------|-------------------------------------------------------|
| 1 | Abbasi R, Bakhshimoghaddam F, Alizadeh M. J. Maternal Fetal Major dietary patterns in relation to preeclampsia among Iranian pregnant women: a case-control study. Neonatal Med. 2021 Nov;34(21):3529-3536. | Specific food source of polyphenols were not analyzed |
| 2 | Amiruddin R, Asrianti T, Abdullah MT. Fiber, Coffee, Cigarette and Gestational Diabetes Mellitus in Makassar Indonesia. Asian Journal of Epidemiology. 2017; 10(1): 26-31.                                  | Study design: cross-sectional                         |

|    |                                                                                                                                                                                                                                                                                                                                                                            |                                                                                          |
|----|----------------------------------------------------------------------------------------------------------------------------------------------------------------------------------------------------------------------------------------------------------------------------------------------------------------------------------------------------------------------------|------------------------------------------------------------------------------------------|
| 3  | Bakker R, Steegers EA, Raat H, Hofman A, Jaddoe VW. Maternal caffeine intake, blood pressure, and the risk of hypertensive complications during pregnancy. The Generation R Study. <i>Am J Hypertens</i> . 2011 Apr;24(4):421-8. doi: 10.1038/ajh.2010.242. Epub 2010 Dec 16.                                                                                              | Analysis was by quantity of caffeine and not of quantity of polyphenols                  |
| 4  | Balbi MA, Crivellenti LC, Zuccolotto DCC, Franco LJ, Sartorelli DS. The relationship of flavonoid intake during pregnancy with excess body weight and gestational diabetes mellitus. <i>Arch Endocrinol Metab</i> . 2019 May 30;63(3):241-249.                                                                                                                             | Study design: cross-sectional                                                            |
| 5  | Bao W, Bowers K, Tobias DK, Hu FB, Zhang C. Pre-pregnancy dietary protein intake, major dietary protein sources, and the risk of gestational diabetes mellitus: a prospective cohort study. <i>Diabetes Care</i> . 2013 Jul;36(7):2001-8. doi: 10.2337/dc12-2018. Epub 2013 Feb 1.                                                                                         | Analysis of protein intake and not polyphenols                                           |
| 6  | Bao W, Tobias DK, Hu FB, Chavarro JE, Zhang C. Pre-pregnancy potato consumption and risk of gestational diabetes mellitus: prospective cohort study. <i>BMJ</i> . 2016 Jan 12;352:h6898. doi: 10.1136/bmj.h6898.                                                                                                                                                           | Analysis of potato consumption and not polyphenols                                       |
| 7  | Basu A, Crew J, Ebersole JL, Kinney JW, Salazar AM, Planinic P, Alexander JM. Dietary Blueberry and Soluble Fiber Improve Serum Antioxidant and Adipokine Biomarkers and Lipid Peroxidation in Pregnant Women with Obesity and at Risk for Gestational Diabetes. <i>Antioxidants (Basel)</i> . 2021 Aug 22;10(8):1318.                                                     | Effect of berry consumption on GDM diagnosis was not analyzed                            |
| 8  | Bech BH, Frydenberg M, Henriksen TB, Obel C, Olsen J. Coffee Consumption During Pregnancy and Birth Weight: Does Smoking Modify the Association? <i>Journal of caffeine research</i> 2015; 5 (2).                                                                                                                                                                          | Nor PE or GDM risk analyzed                                                              |
| 9  | Bujold E, Leblanc V, Lavoie-Lebel É, Babar A, Girard M, Pongui L, Blanchet C, Marc I, Lemieux S, Belkacem A, Sidi EL, Dodin S. High-flavanol and high-theobromine versus low-flavanol and low-theobromine chocolate to improve uterine artery pulsatility index: a double blind randomized clinical trial. <i>J Matern Fetal Neonatal Med</i> . 2017 Sep;30(17):2062-2067. | Nor PE or GDM risk analyzed                                                              |
| 10 | Chen L, Hu FB, Yeung E, Tobias DK, Willett WC, Zhang C. Prepregnancy consumption of fruits and fruit juices and the risk of gestational diabetes mellitus: a prospective cohort study. <i>Diabetes Care</i> . 2012 May;35(5):1079-82. doi: 10.2337/dc11-2105.                                                                                                              | Analysis of fruits and fruit juice consumption not clear, do not indicate the follow up. |
| 11 | Daneshzad E, Tehrani H, Bellissimo N, Azadbakht L. Dietary Total Antioxidant Capacity and Gestational Diabetes Mellitus: A Case-Control Study. <i>Oxid Med Cell Longev</i> . 2020 Oct 8;2020:5471316. doi: 10.1155/2020/5471316.                                                                                                                                           | Analysis did not consider the consumption of polyphenols.                                |
| 12 | de la Torre NG, Assaf-Balut C, Jiménez Varas I, Del Valle L, Durán A, Fuentes M, Del Prado N, Bordiú E, Valerio JJ, Herraiz MA, Izquierdo N, Torrejón MJ, Cuadrado MA, de Miguel P,                                                                                                                                                                                        | Study about the Mediterranean diet and not of polyphenols.                               |

|    |                                                                                                                                                                                                                                                                                                                                                                                                         |                                                                                                        |
|----|---------------------------------------------------------------------------------------------------------------------------------------------------------------------------------------------------------------------------------------------------------------------------------------------------------------------------------------------------------------------------------------------------------|--------------------------------------------------------------------------------------------------------|
|    | Familiar C, Runkle I, Barabash A, Rubio MA, Calle-Pascual AL. Effectiveness of Following Mediterranean Diet Recommendations in the Real World in the Incidence of Gestational Diabetes Mellitus (GDM) and Adverse Maternal-Fetal Outcomes: A Prospective, Universal, Interventional Study with a Single Group. The St Carlos Study. <i>Nutrients</i> . 2019 May 28;11(6):1210. doi: 10.3390/nu11061210. |                                                                                                        |
| 13 | Endeshaw M, Abebe F, Bedimo M, Asart A. Diet and Pre-eclampsia: A Prospective Multicentre Case-Control Study in Ethiopia. <i>Midwifery</i> . 2015 Jun;31(6):617-24.                                                                                                                                                                                                                                     | Estimator is confusing, do not measure polyphenol rich-foods.                                          |
| 14 | Fang JH, Zhang SH, Yu XM & Yang Y. Effects of Quercetin and Melatonin in Pregnant and Gestational Diabetic Women. <i>Lat. Am. J. Pharm.</i> 35 (6): 1420-5 (2016)                                                                                                                                                                                                                                       | Full publication is not available                                                                      |
| 15 | Heazell AEP, Timms K, Scott RE, Rockcliffe L, Budd J, Li M, Cronin R, McCowan LME, Mitchell EA, Stacey T, Roberts D, Thompson JMD. Associations between consumption of coffee and caffeinated soft drinks and late stillbirth-Findings from the Midland and North of England stillbirth case-control study. <i>Eur J Obstet Gynecol Reprod Biol</i> . 2021 Jan;256:471-477.                             | Nor PE or GDM risk analyzed                                                                            |
| 16 | Izadi V, Tehrani H, Haghighatdoost F, Dehghan A, Surkan PJ, Azadbakht L. Adherence to the DASH and Mediterranean diets is associated with decreased risk for gestational diabetes mellitus. <i>Nutrition</i> . 2016 Oct;32(10):1092-6. doi: 10.1016/j.nut.2016.03.006. Epub 2016 Mar 19.                                                                                                                | Study about Mediterranean diet and dietary approaches to stop hypertension (DASH) and not polyphenols. |
| 17 | Jarman M, Mathe N, Ramazani F, Pakseresht M, Robson PJ, Johnson ST, Bell RC; APrON and ENRICH study teams. Dietary Patterns Prior to Pregnancy and Associations with Pregnancy Complications. <i>Nutrients</i> . 2018 Jul 17;10(7):914. doi: 10.3390/nu10070914.                                                                                                                                        | Analysis did not consider the consumption of polyphenols.                                              |
| 18 | Karamanos B, Thanopoulou A, Anastasiou E, Assaad-Khalil S, Albache N, Bachaoui M, Slama CB, El Ghomari H, Jotic A, Lalic N, Lapolla A, Saab C, Marre M, Vassallo J, Savona-Ventura C; MGSD-GDM Study Group. Relation of the Mediterranean diet with the incidence of gestational diabetes. <i>Eur J Clin Nutr</i> . 2014 Jan;68(1):8-13. doi: 10.1038/ejcn.2013.177. Epub 2013 Oct 2.                   | Analysis considered consumption of Mediterranean diet and not consumption of polyphenols.              |
| 19 | Kinnunen TI, Puhkala J, Raitanen J, Ahonen S, Aittasalo M, Virtanen SM, Luoto R. Effects of dietary counselling on food habits and dietary intake of Finnish pregnant women at increased risk for gestational diabetes - a secondary analysis of a cluster-randomized controlled trial. <i>Matern Child Nutr</i> . 2014 Apr;10(2):184-97. doi: 10.1111/j.1740-8709.2012.00426.x. Epub 2012 Jun 27.      | Study considered the type of diet but not polyphenol consumption.                                      |
| 20 | Mannucci C, Attard E, Calapai F, Facchinetti F, D'Anna R, Vannacci A, Santamaria A, Lenti MC, Righi M, Perone M,                                                                                                                                                                                                                                                                                        | Nor PE or GDM risk analyzed                                                                            |

|    |                                                                                                                                                                                                                                                                                                                                                                                                                                |                                                                                                                          |
|----|--------------------------------------------------------------------------------------------------------------------------------------------------------------------------------------------------------------------------------------------------------------------------------------------------------------------------------------------------------------------------------------------------------------------------------|--------------------------------------------------------------------------------------------------------------------------|
|    | Sorbara EE, Alibrandi A, Oteri A, Inferrera G, Calapai G. Coffee intake during pregnancy and neonatal low birth weight: data from a multicenter Italian cross sectional study. <i>J Matern Fetal Neonatal Med.</i> 2020 Nov 18;1-5.                                                                                                                                                                                            |                                                                                                                          |
| 21 | Okubo H, Miyake Y, Tanaka K, Sasaki S, Hirota Y. Maternal total caffeine intake, mainly from Japanese and Chinese tea, during pregnancy was associated with risk of preterm birth: the Osaka Maternal and Child Health Study. <i>Nutr Res.</i> 2015 Apr;35(4):309-16.                                                                                                                                                          | Nor PE or GDM risk analyzed                                                                                              |
| 22 | Radesky JS, Oken E, Rifas-Shiman SL, Kleinman KP, Rich-Edwards JW, Gillman MW. Diet during early pregnancy and development of gestational diabetes. <i>Paediatr Perinat Epidemiol.</i> 2008 Jan;22(1):47-59. doi: 10.1111/j.1365-3016.2007.00899.x.                                                                                                                                                                            | Study considered the type of diet and did not consider consumption of polyphenols.                                       |
| 23 | Ruiz-Gracia T, Duran A, Fuentes M, Rubio MA, Runkle I, Carrera EF, Torrejón MJ, Bordiú E, Valle LD, García de la Torre N, Bedia AR, Montañez C, Familiar C, Calle-Pascual AL. Lifestyle patterns in early pregnancy linked to gestational diabetes mellitus diagnoses when using IADPSG criteria. The St Carlos gestational study. <i>Clin Nutr.</i> 2016 Jun;35(3):699-705. doi: 10.1016/j.clnu.2015.04.017. Epub 2015 May 8. | Study considered the type of food consumed and lifestyle. It did not consider consumption of polyphenols.                |
| 24 | Schoenaker DA, Soedamah-Muthu SS, Callaway LK, Mishra GD. Pre-pregnancy dietary patterns and risk of gestational diabetes mellitus: results from an Australian population-based prospective cohort study. <i>Diabetologia.</i> 2015 Dec;58(12):2726-35. doi: 10.1007/s00125-015-3742-1. Epub 2015 Sep 10.                                                                                                                      | Analysis considered dietary patterns and not polyphenols.                                                                |
| 25 | Sharbaf, F. R., Dehghanpour, P., Shariat, M., & Dalili, H. (2013). Caffeine Consumption and Incidence of Hypertension in Pregnancy. <i>Journal of Family &amp; Reproductive Health</i> , 7(3).                                                                                                                                                                                                                                 | Analysis was by quantity of caffeine and not by quantity of polyphenols.                                                 |
| 26 | Tobias DK, Zhang C, Chavarro J, Bowers K, Rich-Edwards J, Rosner B, Mozaffarian D, Hu FB. Prepregnancy adherence to dietary patterns and lower risk of gestational diabetes mellitus. <i>Am J Clin Nutr.</i> 2012 Aug;96(2):289-95. doi: 10.3945/ajcn.111.028266. Epub 2012 Jul 3.                                                                                                                                             | Analysis considered dietary patterns and not polyphenols.                                                                |
| 27 | Yusuf H, Subih HS, Obeidat BS, Sharkas G. Associations of macro and micronutrients and antioxidants intakes with preeclampsia: A case-control study in Jordanian pregnant women. <i>Nutr Metab Cardiovasc Dis.</i> 2019 May;29(5):458-466. doi: 10.1016/j.numecd.2019.01.008. Epub 2019 Jan 29.                                                                                                                                | Study considered dietary patterns and types of macro and micronutrients but did not consider consumption of polyphenols. |

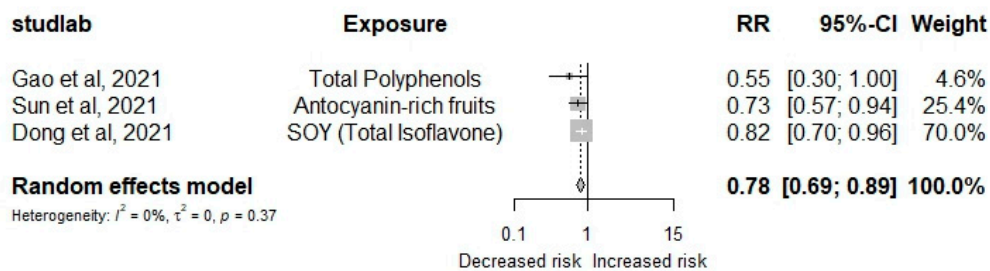

(A)

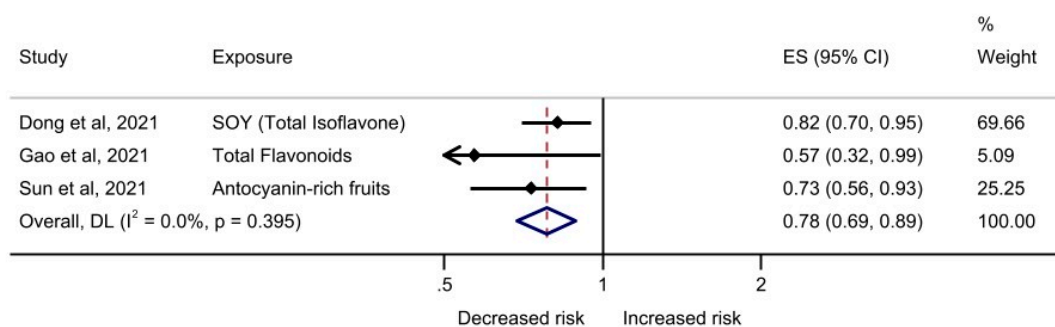

(B)

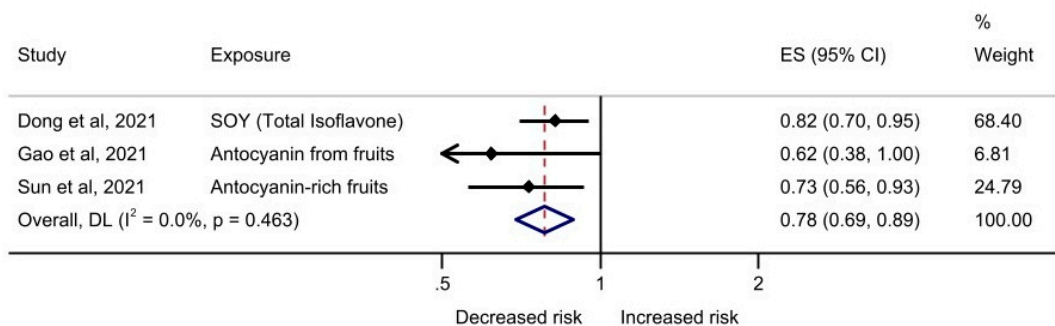

(C)

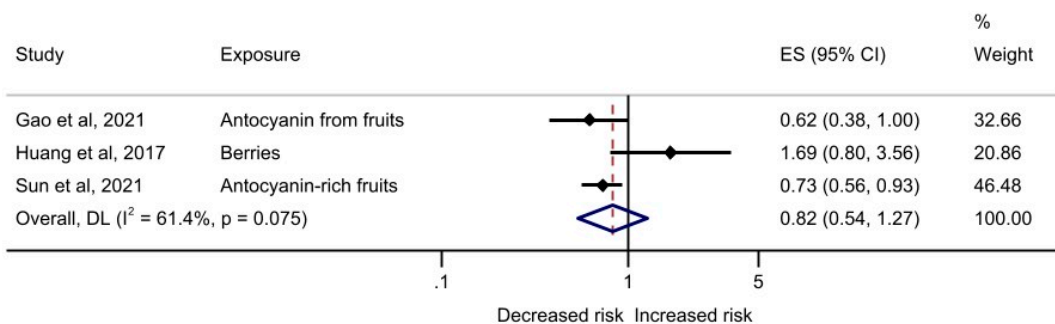

(D)

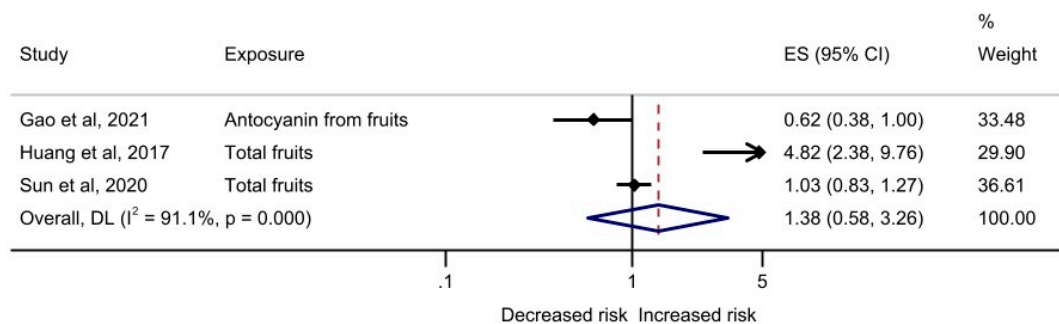

(E)

**Supplementary Figure S1.** Total polyphenol intake or their subclasses and GDM association. **Figure S1A.** Total polyphenol intake considering isoflavone, total polyphenols and anthocyanin-rich fruits and GDM association. **Figure S1B.** Total polyphenol intake considering isoflavone, total flavonoids and anthocyanin-rich fruits and GDM association. **Figure S1C.** Total polyphenol intake considering isoflavone, anthocyanins from fruits and anthocyanin-rich fruits and GDM association. **Figure S1D.** Total polyphenol intake considering berries, anthocyanins from fruits and anthocyanin-rich fruits and GDM association. **Figure S1E.** Total polyphenol intake considering anthocyanins from fruits and total fruits and GDM association.

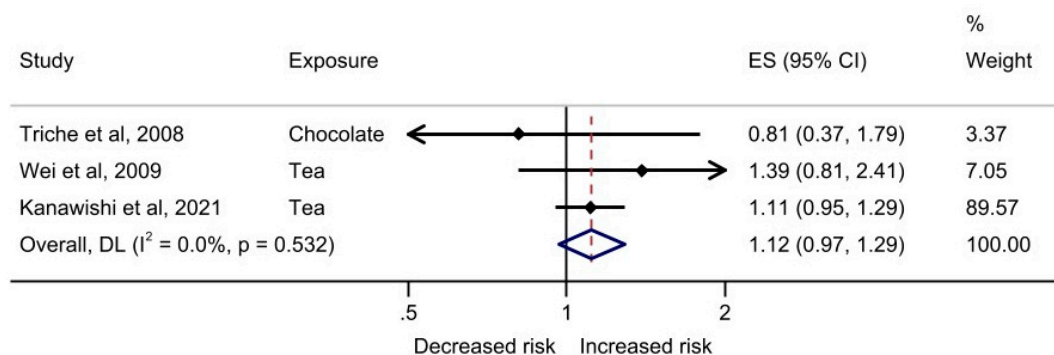

**Supplementary Figure S2.** Total polyphenol intake and PE association without gestational hypertension.
